# Supplementary material for: Reduced graphene oxide induced confined growth of PbTe crystals and enhanced electrochemical Li-storage properties
Source: Royal Society of Chemistry journal article supplement (doi:10.1039/c3ra42466a), 2013-01-01
Supplement: c3ra42466a.pdf [file c3ra42466a.pdf]

## Supplementary information

### Reduced graphene oxide induced confined growth of PbTe crystals and enhanced electrochemical Li-storage properties

Fangfang Tu,<sup>ab</sup> Ying Huo,<sup>ab</sup> Jian Xie,<sup>\*ab</sup> Gaoshao Cao,<sup>ab</sup> Tiejun Zhu,<sup>ab</sup> Xinbing Zhao<sup>ab</sup> and Shichao Zhang<sup>c</sup>

<sup>a</sup>State Key Laboratory of Silicon Materials, Department of Materials Science and Engineering, Zhejiang University, Hangzhou 310027, China. E-mail: xiejian1977@zju.edu.cn; Fax: +86-571-87951451; Tel: +86-571-87952181

<sup>b</sup>Key Laboratory of Advanced Materials and Applications for Batteries of Zhejiang Province, China

<sup>c</sup>School of Materials Science and Engineering, Beijing University of Aeronautics and Astronautics, Beijing 100191, China

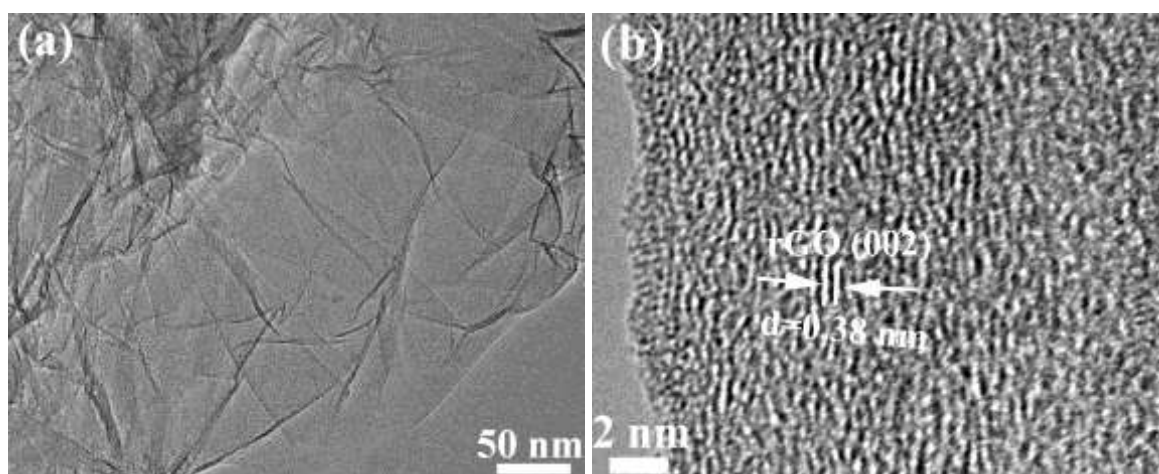

**Fig. S1** (a) TEM and (b) HRTEM images of bare rGO.

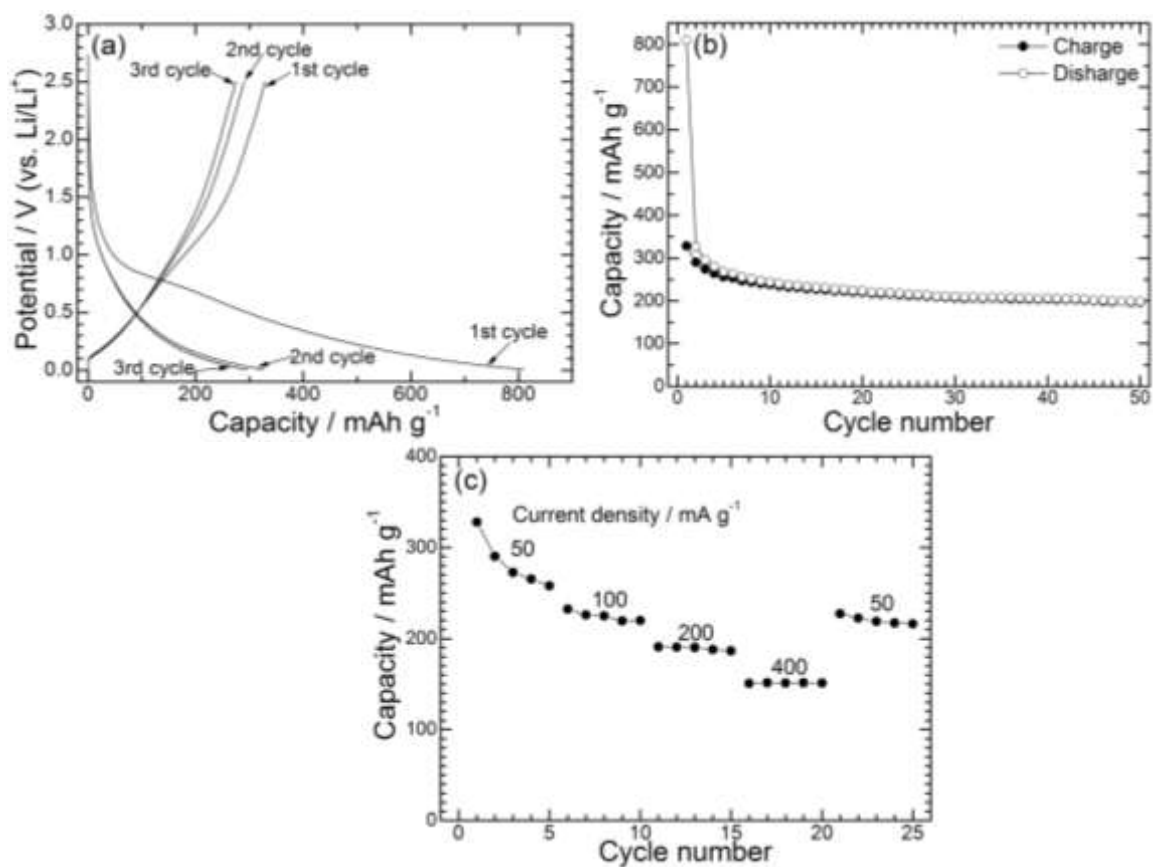

**Fig. S2** Electrochemical performance of bare rGO: (a) voltage profiles and (b) cycling stability charged-discharged at 50 mA g<sup>-1</sup>, and (c) rate capability charged at various current densities and discharged at 50 mA g<sup>-1</sup>.

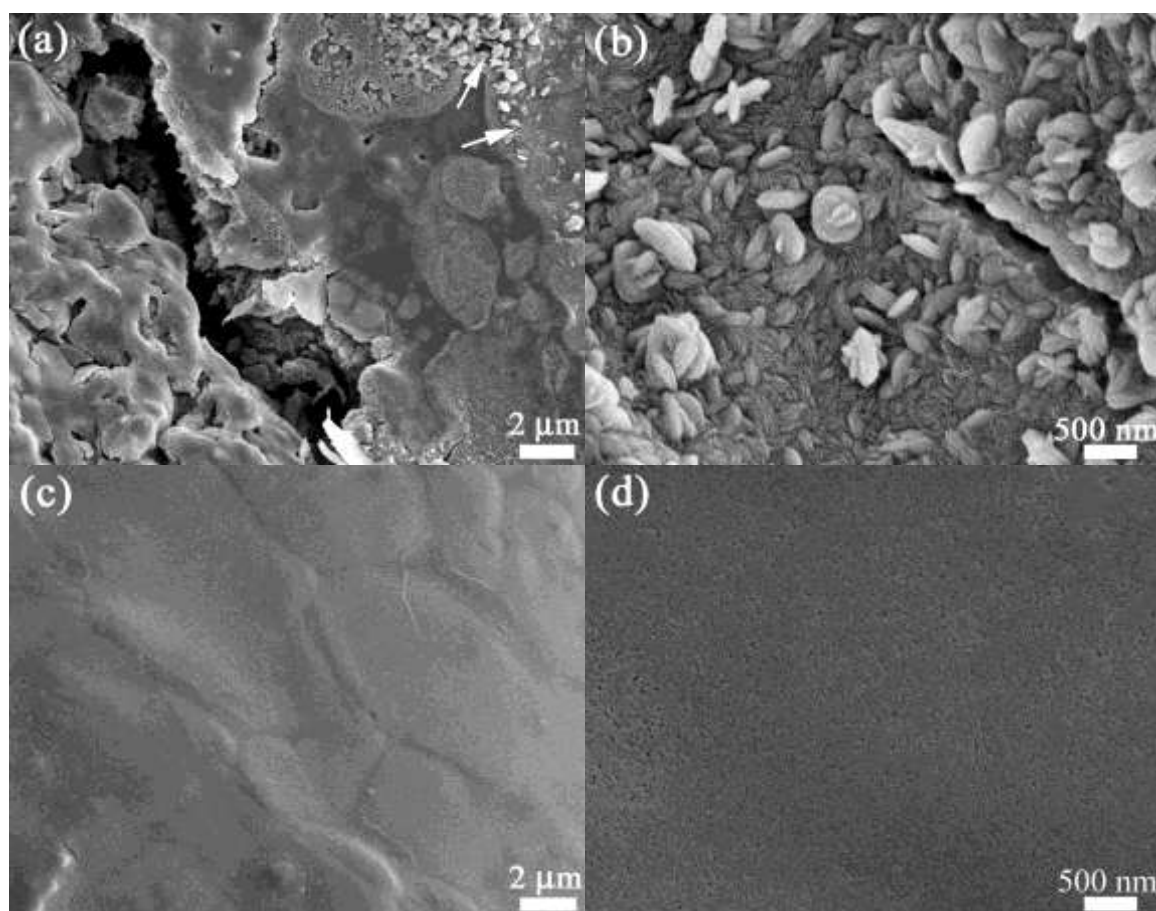

**Fig. S3** (a) and (b) SEM images of bare PbTe electrode after 50 cycles, and (c) and (d) SEM images of PbTe/G4 electrode after 100 cycles.
